# Supplementary material
Source: PubMed Central journal article supplement (PMC6954916)
Supplement: 13238_2019_671_MOESM1_ESM.pdf [file 13238_2019_671_MOESM1_ESM.pdf]

## Supplementary materials

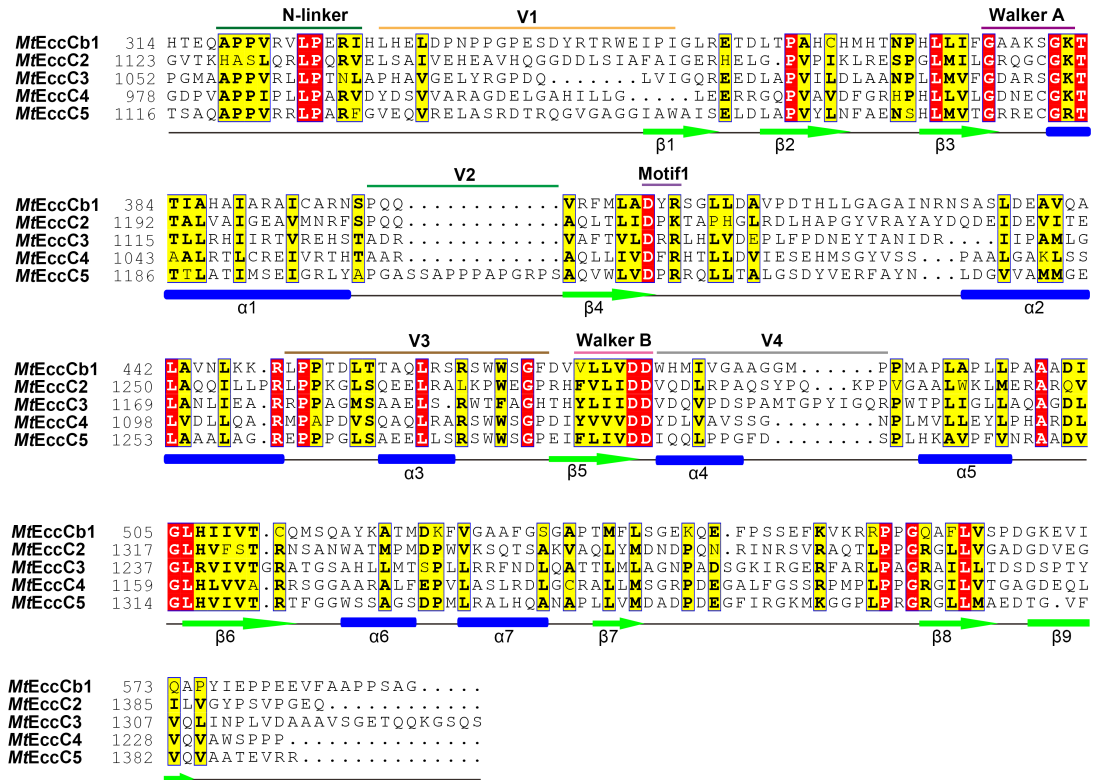

**Figure S1. Sequence alignment of EccC-ATPase<sub>3</sub> from ESX-1~5 of *Mycobacterium tuberculosis*.**

Secondary structures are labeled below the sequences. Conserved motifs and variable segments are identified above the sequences. V1-4, correspond to variable regions 1-4.

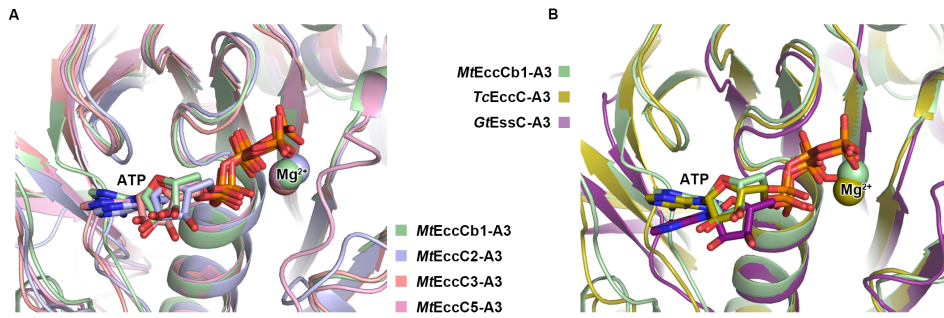

**Figure S2. Superposition of *MtEccC*-ATPase<sub>3</sub> structures at the nucleotide-binding site.**

(A) The four EccC-ATPase<sub>3</sub> structures from *Mycobacterium tuberculosis* are superimposed at the nucleotide-binding site.

(B) EccCb1-ATPase<sub>3</sub> from *Mycobacterium tuberculosis*, EccC-ATPase<sub>3</sub> from *Thermomonospora curvata* (PDB code: 4NH0) and EssC-ATPase<sub>3</sub> from *Geobacillus thermodenitrificans* (PDB code: 5FV0) are superimposed at the nucleotide-binding site.

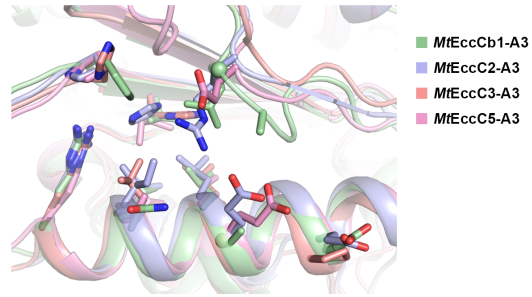

**Figure S3. Superposition of the four *MtEccC*-ATPase<sub>3</sub> structures at the signal recognition pocket.**

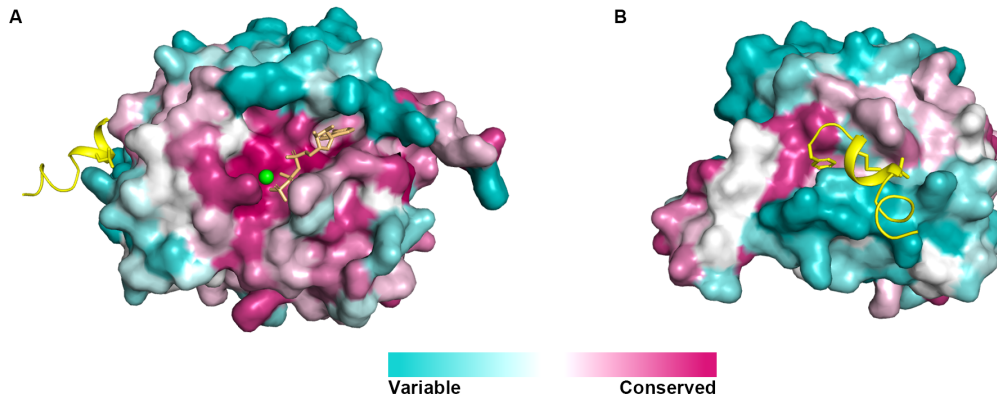

**Figure S4. Residues conservation map on *MtEccCb1-ATPase<sub>3</sub>+MtEsxB* structure.**

Residue conservation based on 143 unique EccC sequences was mapped onto the *MtEccCb1-ATPase<sub>3</sub>+MtEsxB* structure. The analysis reveals that the ATP (wheat) and magnesium (green) binding sites are highly conserved (A), whereas the signal peptide (yellow) recognition pocket is variable (B).

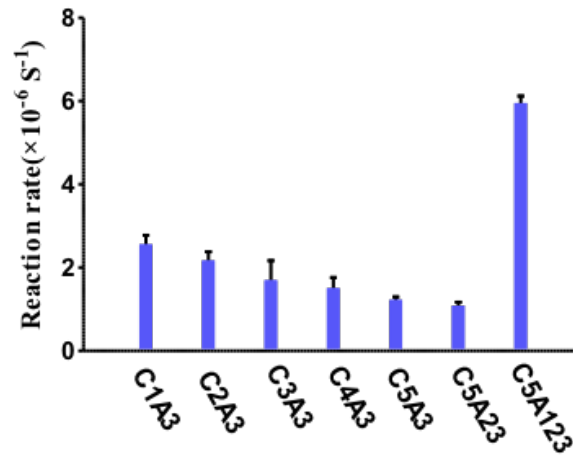

**Figure S5. The enzyme activity of ATPase domains of EccC protein from *Mtb*.**

All the groups exhibit low reaction rate indicating little enzyme activity, even though the EccC5 fragment containing three ATPase domains has a relative higher value than the others. Each bar is the mean and SD of three measurements.

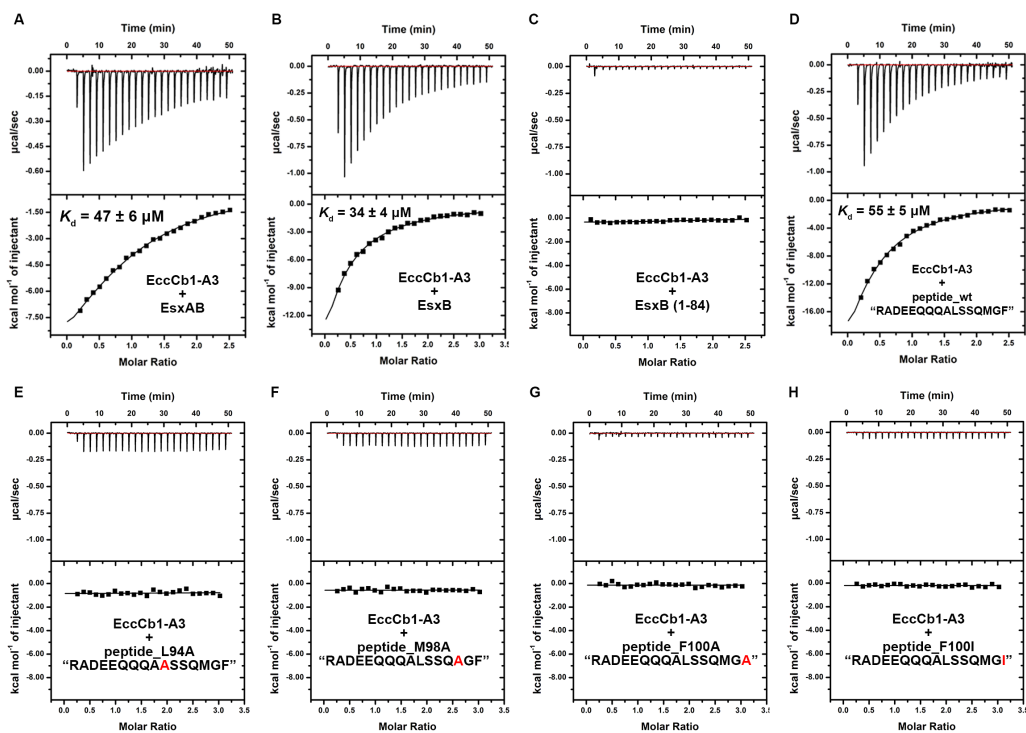

**Figure S6. ITC assay analysis for substrate recognition.**

The ITC assay shows the binding affinities of (A) EsxAB, (B) EsxB, (C) EsxB (residues 1-84), (D) peptide\_wt, (E) peptide\_L94A, (F) peptide\_M98A, (G) peptide\_F100A and (H) peptide\_F100I, to EccCb1-ATPase<sub>3</sub>. The data were representative of at least three repetitions. For E-H, the point mutations are indicated by the red highlight in the sequence.

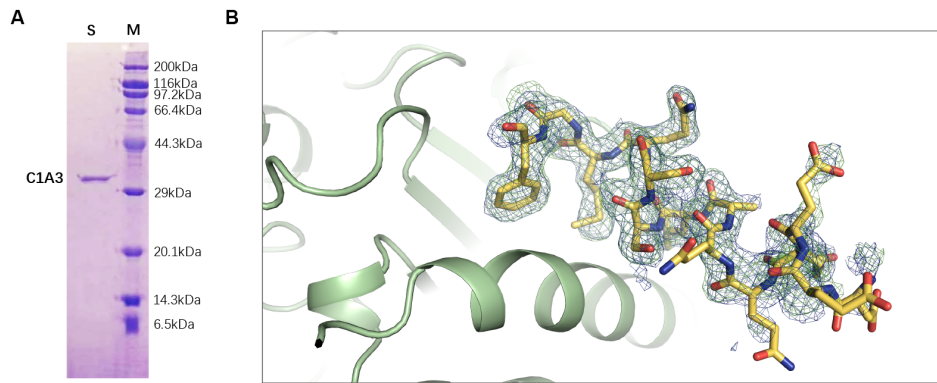

**Figure S7. Degradation analysis of *MtEccCb1*-ATPase<sub>3</sub>+*MtEsxB* complex**

(A) SDS-PAGE analysis of crystals of *MtEccCb1*-ATPase<sub>3</sub>+*MtEsxB*. *MtEccCb1*-ATPase<sub>3</sub> was stable 4 days after crystallization, while *MtEsxB* was degraded severely to small pieces that cannot be observed on the gel. S, crystal sample of *MtEccCb1*-ATPase<sub>3</sub>+*MtEsxB*; M, marker.

(B) The omit density of the C-terminal end of *MtEsxB* in the *MtEccCb1*-ATPase<sub>3</sub>+*MtEsxB* structure. The  $2F_o-F_c$  annealing omit density map (blue mesh) and  $F_o-F_c$  annealing omit map (green mesh) are contoured at  $1\sigma$  and  $3\sigma$ , respectively.

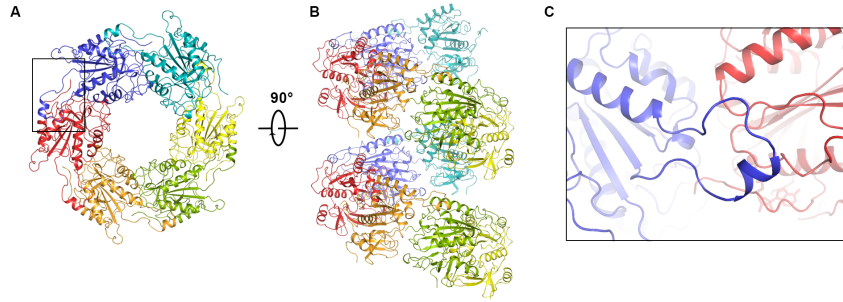

**Figure S8. The helical crystal packing of *MtEccC5*-ATPase<sub>3</sub>.**

(A) The crystal packing of six *MtEccC5*-ATPase<sub>3</sub> looking down the 6-fold screw axis viewed from bottom. The box marks the interaction of the protruding fragment with neighboring molecule.

(B) The helical crystal packing rotated for 90° relative to (A).

(C) Zoom-in view of the protruding fragment interacting with neighboring molecule in the crystal packing.



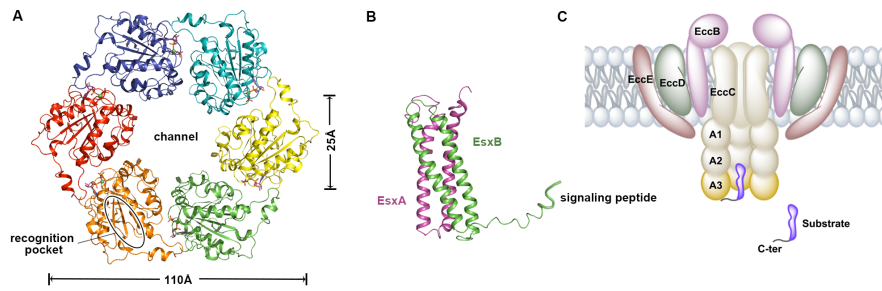

**Figure S9. The hexameric model of EccC-ATPase<sub>3</sub>.**

(A) The hexameric model of *MtEccCb1*-ATPase<sub>3</sub> viewed from bottom, with central channel diameter of 25 Å and outer diameter of 110 Å. The location of the substrate recognition pocket is marked with a circle. ATP and Mg<sup>2+</sup> are shown as a stick model and a sphere, respectively.

(B) The rod-shaped structure of EsxAB complex (PDB code: 1WA8). EsxA and EsxB are colored magenta and green, respectively.

(C) A model of the type VII secretion system translocating substrate protein across membrane. A1/A2/A3, the ATPase<sub>1</sub>/ATPase<sub>2</sub>/ATPase<sub>3</sub> domain of EccC protein; C-ter, the C-terminal peptide of substrate protein.

**Table S1. PCR Primers for constructs.**

| Constructs                                | Forward / Reverse Primers (5'→3')                                                                                       |
|-------------------------------------------|-------------------------------------------------------------------------------------------------------------------------|
| pET-M3C- <i>MtEccCb1</i><br>(315-591)     | F: 5'-CTGTTCCAGGGGCCGGATCCACCGAACAGGCACCTCCGGTGC-3'<br>R: 5'-GTGGTGGTGGTGGTGGTGGTCTCGAGTTAACCGGCGCTTGGGGGTGCTGC-3'      |
| pET-32-M3C- <i>MtEccC2</i><br>(1127-1396) | F: 5'-CCAGGGGCCCGGATCCCACGCAAGTCTGCAGCGGCTGC-3'<br>R: 5'-GTGGTGGTGGTGGTGGTGGTCTCGAGCTACTGCTCGCCGGGCACCGACG-3'           |
| pET-22b- <i>MtEccC3</i><br>(1060-1330)    | F: 5'-CTTTAAGAAGGAGATATACATATGCGGTTGTTGCCACCAACCTTGC-3'<br>R: 5'-GTGGTGGTGGTGGTGGTGGTCTCGAGTCATGACTGACTCCCCTTCTG-3'     |
| pET-22b- <i>MtEccC5</i><br>(1125-1391)    | F: 5'-CTTTAAGAAGGAGATATACATATGCGGTTGCCGGCGCGGTTCCGGCG-3'<br>R: 5'-GTGGTGGTGGTGGTGGTGGTGGTCTCGAGCTACCGACGCACCTCGGTGGC-3' |
| pET-32-M3C- <i>MtEsxB</i>                 | F: 5'-TTCTGTTCAGGGGCCCGGATCCATGGCAGAGATGAAGACCGATGC-3'<br>R: 5'-GGTGGTGGTGGTGGTGGTGGTCTCGAGTCAGAAGCCCATTGCGAGGACAG-3'   |
| pET-32-M3C- <i>MtEsxA</i>                 | F: 5'-GTTTACCAGGGGCCCGGATCCATGACAGAGCAGCAGTGAATTCG-3'<br>R: 5'-GGTGGTGGTGGTGGTGGTGGTCTCGAGCTATGCGAACATCCCAGTGACGTTGC-3' |
| pET-32-M3C- <i>MtEsxB-MtEsxA</i>          | F: 5'-GTTTACCAGGGGCCCGGATCCATGGCAGAGATGAAGACCGATGCC-3'<br>R: 5'-GTGGTGGTGGTGGTGGTGGTGGTCTCGAGCTATGCGAACATCCCAGTGACGT-3' |
| pET-32-M3C- <i>MtEsxB</i><br>(F100A)      | F: 5'-GCGTGACTCGAGCACCACCACCACCACCCTGAGATCCG-3'<br>R: 5'-GCTCGAGTCACGCGCCCATTTGCGAGGACAGCGCCTGCTG-3'                    |

**Table S2. Data collection and refinement statistics.**

|                                         | <i>MfEccCb1-ATPase<sub>3</sub></i>              | <i>MfEccC2-ATPase<sub>3</sub></i> | <i>MfEccC3-ATPase<sub>3</sub></i>               | <i>MfEccC5-ATPase<sub>3</sub></i> | <i>MfEccCb1-ATPase<sub>3</sub>+MEsxB</i> |
|-----------------------------------------|-------------------------------------------------|-----------------------------------|-------------------------------------------------|-----------------------------------|------------------------------------------|
| <b>Data collection</b>                  |                                                 |                                   |                                                 |                                   |                                          |
| Space group                             | <i>P2<sub>1</sub>2<sub>1</sub>2<sub>1</sub></i> | <i>P2<sub>1</sub></i>             | <i>P2<sub>1</sub>2<sub>1</sub>2<sub>1</sub></i> | <i>P6<sub>5</sub></i>             | <i>C222<sub>1</sub></i>                  |
| Cell dimensions                         |                                                 |                                   |                                                 |                                   |                                          |
| a, b, c (Å)                             | 61.22, 77.31, 106.01                            | 51.45, 69.69, 75.96               | 53.36, 56.63, 93.53                             | 89.16, 89.16, 62.64               | 81.58, 129.65, 64.20                     |
| $\alpha, \beta, \gamma$ (°)             | 90, 90, 90                                      | 90, 101, 90                       | 90, 90, 90                                      | 90, 90, 120                       | 90, 90, 90                               |
| Resolution (Å)                          | 50.00-2.10 (2.21-2.10) <sup>a</sup>             | 50.00-2.20 (2.32-2.20)            | 50.00-1.97 (2.00-1.97)                          | 50.00-2.00 (2.03-2.00)            | 50.00-1.98 (2.01-1.98)                   |
| Unique reflections                      | 30,107                                          | 26,929                            | 19,248                                          | 19,280                            | 23,760                                   |
| Completeness (%)                        | 100.0 (100.0)                                   | 99.9 (100.0)                      | 93.2 (67.3)                                     | 100.0 (100.0)                     | 98.0 (77.5)                              |
| $R_{\text{merge}}$                      | 0.134 (0.331)                                   | 0.091 (0.642)                     | 0.116 (0.448)                                   | 0.123 (0.440)                     | 0.189 (0.674)                            |
| Redundancy                              | 12.9 (12.9)                                     | 6.9 (7.0)                         | 5.5 (3.7)                                       | 4.9 (4.6)                         | 10.5 (5.5)                               |
| $I/\delta(I)$                           | 3.6 (1.8)                                       | 7.3 (1.2)                         | 13.4 (1.7)                                      | 16.5 (2.8)                        | 13.0 (1.1)                               |
| $CC_{1/2}$                              | 0.998 (0.988)                                   | 0.999 (0.886)                     | 0.999 (0.777)                                   | 0.999 (0.841)                     | 0.999 (0.728)                            |
| Wilson B factors (Å <sup>2</sup> )      | 16.4                                            | 33.4                              | 30.1                                            | 27.5                              | 28.1                                     |
| <b>Refinement</b>                       |                                                 |                                   |                                                 |                                   |                                          |
| Resolution (Å)                          | 43.72-2.10                                      | 38.71-2.20                        | 46.35-1.98                                      | 38.61-2.00                        | 45.61-1.98                               |
| No. of Reflections                      | 29,963                                          | 26,880                            | 19,172                                          | 19,257                            | 23,744                                   |
| $R_{\text{work}} / R_{\text{free}}$ (%) | 20.2 / 24.6                                     | 17.6 / 22.5                       | 18.1 / 22.8                                     | 16.7 / 20.0                       | 17.0 / 20.8                              |
| No. of non-H atoms                      |                                                 |                                   |                                                 |                                   |                                          |
| Protein                                 | 3986                                            | 4037                              | 1955                                            | 2087                              | 2105                                     |
| Ligand/ion                              | 64                                              | 64                                | 32                                              | 32                                | 32                                       |
| Water                                   | 386                                             | 216                               | 148                                             | 214                               | 221                                      |
| Average B factor (Å <sup>2</sup> )      |                                                 |                                   |                                                 |                                   |                                          |

|                       | <i>MtEccCb1-ATPase<sub>3</sub></i> | <i>MtEccC2-ATPase<sub>3</sub></i> | <i>MtEccC3-ATPase<sub>3</sub></i> | <i>MtEccC5-ATPase<sub>3</sub></i> | <i>MtEccCb1-ATPase<sub>3</sub>+MEsxB</i> |
|-----------------------|------------------------------------|-----------------------------------|-----------------------------------|-----------------------------------|------------------------------------------|
| Protein               | 22.23                              | 40.51                             | 44.68                             | 34.26                             | 33.38                                    |
| Ligand/ion            | 12.76                              | 34.70                             | 25.94                             | 24.85                             | 26.94                                    |
| Water                 | 27.01                              | 40.35                             | 44.38                             | 39.88                             | 42.24                                    |
| R.m.s deviations      |                                    |                                   |                                   |                                   |                                          |
| Bond lengths (Å)      | 0.003                              | 0.007                             | 0.015                             | 0.003                             | 0.007                                    |
| Bond angles (°)       | 0.715                              | 0.976                             | 1.328                             | 0.810                             | 0.857                                    |
| Ramachandran plot (%) |                                    |                                   |                                   |                                   |                                          |
| Favored               | 97.5                               | 97.3                              | 96.8                              | 97.8                              | 97.4                                     |
| Allowed               | 2.5                                | 2.7                               | 3.2                               | 2.2                               | 2.6                                      |
| Outliers              | 0.0                                | 0.0                               | 0.0                               | 0.0                               | 0.0                                      |

<sup>a</sup> The values for the highest shell are shown in parentheses.

**Table S3** The *r.m.s.d.* values between different ATPase<sub>3</sub> domains after superposition.

| <i>r.m.s.d.</i> (Å)<br>Ca pairs | C1A3 | C2A3 | C3A3 | C5A3 |
|---------------------------------|------|------|------|------|
| C1A3                            |      | 1.27 | 1.05 | 0.99 |
| C2A3                            | 152  |      | 2.02 | 1.30 |
| C3A3                            | 140  | 162  |      | 1.22 |
| C5A3                            | 151  | 171  | 154  |      |
